# Supplementary material for: Acidosis: The Prime Determinant of Depressed Sensorium in Diabetic Ketoacidosis
Source: Oxford University Press journal article supplement (doi:10.2337/dc10-0102), 2010-05-18

## ONLINE APPENDIX

**Supplemental Table 1:** Univariate vs multiple logistic regression of clinical and biochemical data with mental status (alert vs altered) as dependent variable.

|                  | Univariate Analysis |          | Multivariate Analysis |         |
|------------------|---------------------|----------|-----------------------|---------|
|                  | t-value             | p-value  | Odd ratio             | p-value |
| pH               | 6.87                | < 0.0001 | 15.89 - > 999.99      | 0.001   |
| HCO <sub>3</sub> | 4.70                | <0.0001  | 0.91 – 1.14           | 0.792   |
| Glucose          | -3.61               | 0.0004   | 0.99 – 1.00           | 0.711   |
| BUN              | -3.49               | 0.0007   | 0.97 – 1.01           | 0.304   |
| WBC              | -3.32               | 0.001    | 0.92 – 1.02           | 0.223   |
| Creatinine       | -3.07               | 0.003    | 0.74 – 1.24           | 0.755   |
| Diastolic BP     | 2.28                | 0.023    | 0.96 – 1.02           | 0.468   |
| Systolic BP      | 2.43                | 0.022    | 0.99 – 1.04           | 0.282   |
| Osmolality       | -2.07               | 0.041    | 0.97- 1.00            | 0.142   |

**Supplemental Table 2:** Sensitivity and Specificity (%) of pH and Osmolality as predictors of altered mentation in all 216 subjects:

| Osmolality Quartile |             | pH Quartile |    |    |     |
|---------------------|-------------|-------------|----|----|-----|
|                     |             | 1           | 2  | 3  | 4   |
| 1                   | Sensitivity | 19          | 51 | 75 | 88  |
|                     | Specificity | 98          | 87 | 65 | 32  |
| 2                   | Sensitivity | 33          | 69 | 81 | 94  |
|                     | Specificity | 94          | 76 | 48 | 14  |
| 3                   | Sensitivity | 41          | 71 | 86 | 100 |
|                     | Specificity | 93          | 69 | 39 | 6   |
| 4                   | Sensitivity | 61          | 78 | 93 | 100 |
|                     | Specificity | 87          | 57 | 20 | 0   |

The first (lowest) quartile of pH and the fourth (highest) quartile of osmolality predicted depressed consciousness at presentation with 61% sensitivity and 87% specificity.

**Supplemental Figure 1** Quartiles of pH and Osmolality as predictors of altered mentation in all 216 subjects.

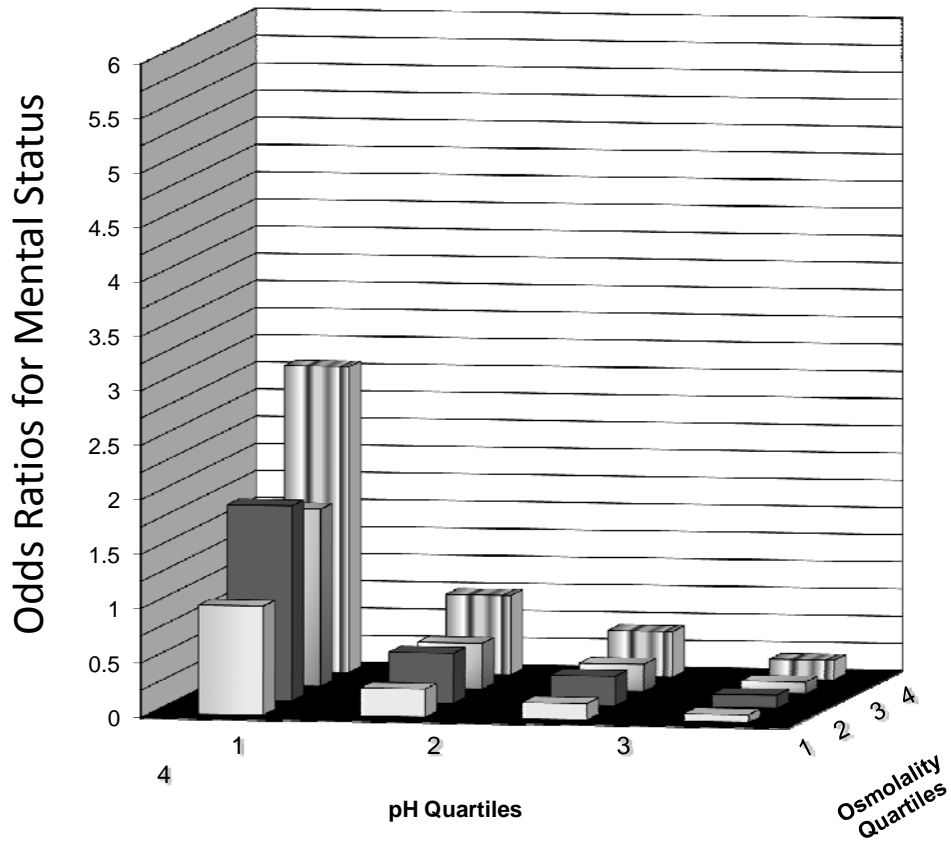

**Supplemental Figure 2** ROC curve of odds ratio for presenting with altered mentation in all 216 subjects with pH and serum osmolarity as dependent variables.

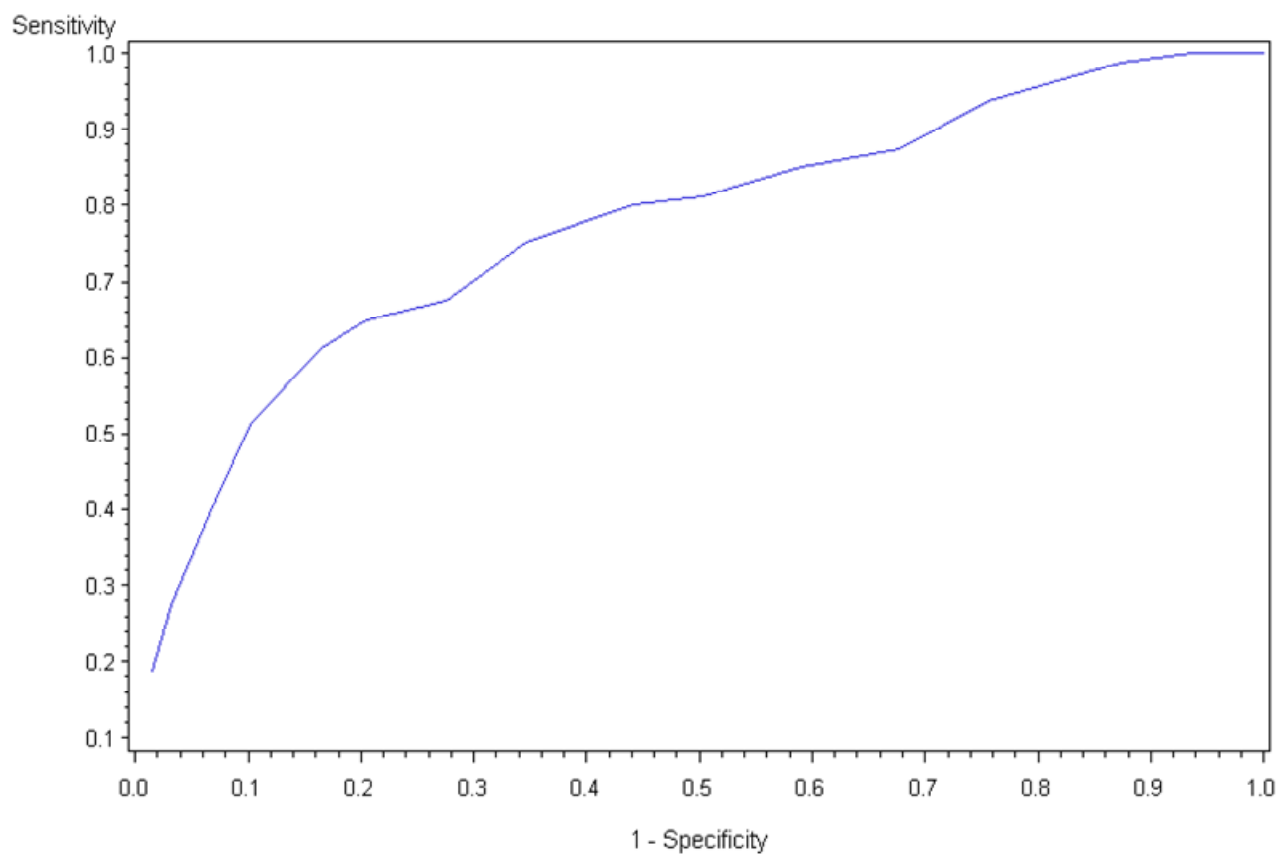

Supplement: dc100102onlineappendix.pdf [file dc100102onlineappendix.pdf]
